# Supplementary material for: Fibroblast Growth Factor Receptor 1 (FGFR1) Amplification Detected by Droplet Digital Polymerase Chain Reaction (ddPCR) Is a Prognostic Factor in Colorectal Cancers
Source: PubMed Central journal article supplement — Cancer Res Treat. 2019 May 8;52(1):74–84. doi: 10.4143/crt.2019.062 (PMC6962468; doi:10.4143/crt.2019.062), 2019-05-08
Supplement: crt-2019-062-suppl2.pdf [file crt-2019-062-suppl2.pdf]

**S2 Table.** Fibroblast growth factor receptor 1 (*FGFR1*) gene status in droplet digital polymerase chain reaction compared with FISH

| ddPCR            | FISH             |               |
|------------------|------------------|---------------|
|                  | No-amplification | Amplification |
| No-amplification | 14               | 1             |
| Amplification    | 0                | 5             |

FISH, fluorescence *in situ* hybridization.
